# Supplementary material for: Autophagy-dependent survival is controlled with a unique regulatory network upon various cellular stress events
Source: PubMed Central journal article supplement (PMC7988068; doi:10.1038/s41419-021-03599-7), 2021-03-23
Supplement: 41419_2021_3599_MOESM1_ESM.pdf [file 41419_2021_3599_MOESM1_ESM.pdf]

## Supplementary Information

### “Autophagy-dependent survival is controlled

### with a unique regulatory network upon various cellular stress events”

Orsolya Kapuy, Marianna Holczer, Margita Márton, Tamás Kocsis

#### I. Mathematical codes for computational simulations

Although the complexity of the cellular system makes really difficult to make mathematical models of a biological regulatory network, with a proper reduction approach a simple wiring diagram can be created containing the key components of the control network (1, 2). Our wiring diagrams are based on the relevant system level feedback loops, while they are independent form can be independent of the identity of molecular players. With this mathematical modelling, the qualitative features of the dynamical system behind autophagy regulation can be easily explored by using both computational simulations and signal-response curves. A biological regulatory network can be translated into a set of ordinary differential equation (ODE) to describe how the concentration/activity of each control element in the network changes with the time (3, 4). A generic differential equation depicting the temporal changes of a regulatory element is composed of two parts: production and consumption terms. In a cellular protein-protein regulatory network the production can be given by protein synthesis (i.e. transcription and translation) and/or an activation (i.e. post-translational modification) term, while the consumption can be given by protein degradation and/or inactivation term. Usually synthesis and degradation reactions are described by mass action kinetics, whereas protein activity can be described either by mass action or Michaelis-Menten kinetics (1, 5-7). Solving a set of non-linear ODEs gives the time evolution of the relative protein concentration/activity (time courses).

The temporal profiles were computed numerically using *XPP-AUT*, which is freely available from <http://www.math.pitt.edu/~bard/xpp/xpp.html>. All the simulations presented in the text are based on the following XPP codes which contains ODEs. The rate constants ( $k$ ) have the dimension of  $\text{min}^{-1}$  and Michaelis constants ( $J$ ) are dimensionless. The proteins levels/activities are given in arbitrary units (a.u).

*The code for a general model simulating time series*

```
# a model to simulate autophagy induction with XPP-AUT  
  
# initial conditions
```

```

init AUCO=1.3381e-005, PAUIN=0.0717, AUIN=0.0382, mTOR=0.6370, AUEX=0.0019,
DEATH=0.0044

# differential equations
# AUCO represents the active form of autophagy controller
AUCO' = (kaac + kaac'*AUIN)*(AUCOT-AUCO)/(JAUCO + AUCOT-AUCO) - (kiac +
kiac'*mTOR)*AUCO/(JAUCO + AUCO)

# pAUIN represents the active, pre-form of autophagy inducer
pAUIN' = (kapai + kapai'*stress/(1+stress))*(pAUINT-pAUIN) - (kipai +
kipai'*AUCO + kipai"*mTOR + kipai'"*DEATH)*pAUIN

# AUIN represents the active form of autophagy inducer
AUIN' = kaai*pAUIN*(AUINT-AUIN)/(JAUIN + AUINT-AUIN) - (kiai +
kiai'*mTOR)*AUIN/(JAUIN + AUIN)

# mTOR represents the active form of mTORC1
mTOR' = (kamtor + kamtor'*stress/(1+stress) + kamtor"*DEATH)*(mtoT-mTOR) -
(kimtor + kimtor'*AUIN + kimtor"*AUCO)*mTOR

# AUEX represents the active AUEX genes; when AUEX is active we assume that
autophagy is also active
AUEX' = (kaax + kaax'*AUCO + kaax"*AUIN)*(AUEXT- AUEX)/(JAUEX + AUEXT-
AUEX) - (kiax + kiax'*mTOR + kiax"*DEATH)* AUEX /(JAUEX + AUEX)

# DEATH represents the possible cell death of the cell
DEATH' =(kade + kade'*AUCO + kade"*stress + kade'"*mTOR)*(1-DEATH)/(Jdea +
1-DEATH) - (kide + kide'*AUEX)*DEATH/(Jdea + DEATH)

# parameters
# simulating rapamycin treatment: stress=0.75
# simulating high stress with GADD34 depletion: stress=9, AUIT=0.1
# simulating high stress with CHOP depletion: stress=9, AUCOT=0.1
# simulating high stress with GADD34 over-expression: stress=9, AUIT=2
# simulating high stress with CHOP over-expression: stress=9, AUCOT=1.25
# simulating high stress with KEAP1 depletion: stress=7.5, kaac=5
# simulating EGCG treatment: kaai=50, kimtor=50
# simulating EGCG treatment with high stress: kaai=50, kimtor=50, stress=5
# simulating EGCG treatment with high stress and GADD34 depletion: kaai=50,
kimtor=50, stress=5, AUINT=0.1
p stress=0
p kaac=0.05, kaac'=2, kiac=0.01, kiac'=15, JAUCO=0.001, AUCOT=1
p kapai=0.02, kapai'=1, kipai=0.25, kipai'=20, kipai'"=0, kipai'"=2, pAUIT=1
p kaai=7.5, kai=1.5, kai'=2, AUINT=1, JAUIN=0.2
p kamtor=0.05, kamtor'=0.03, kamtor'"=0.3, kimtor=0.01, kimtor'=0.5,
kimtor'"=10, mtoT=1
p kaax=0.075, kaax'=0.15, kaax'"=2, kiax=0.1, kiax'=20, kiax'"=20, AUEXT=1,
JAUEX=0.2
p kade=0, kade'=0.5, kade'"=0.05, kade'"=0.005, kide=0.01, kide'=30,
Jdea=0.1

done

```

## *The code for a general model calculating balance curves*

```
# a model to simulate autophagy induction with XPP-AUT

# initial conditions
init AUCO=0, AUI=0

# differential equations

# AUCO represents the active form of autophagy inducer
AUCO' = (kaac + kaac'*AUI)*(AUCOT-AUCO)/(JAUCO + AUCOT-AUCO) - (kiac +
kiac'*mTOR)*AUCO/(JAUCO + AUCO)

# AUI represents the active form of autophagy inducer
AUI' = kaai*pAUI*(AUIINT-AUI)/(JAUI + AUIINT-AUI) - (kiai +
kiai'*mTOR)*AUI/(JAUI + AUI)
# steady state function

# mTOR represents the active form of mTOR
mTOR = (kamtor + kamtor'*stress/(1+stress) + kamtor"*DEATH)*mtoT/(kamtor +
kamtor'*stress/(1+stress) + kamtor"*DEATH + kimtor + kimtor'*AUI +
kimtor"*AUCO)

# pAUI represents the active, pre-form of autophagy inducer
pAUI = (kapai + kapai'*stress/(1+stress))*pAUIINT/(kapai +
kapai'*stress/(1+stress) + kipai + kipai'*AUCO + kipai"*mTOR +
kipai"*DEATH)

# AUEx represents the active AUEx genes; when AUEx is active we assume that
autophagy is also active
AUEx = AUExT*GK(kaax + kaax'*AUCO + kaax"*AUI,kiax + kiax'*mTOR +
kiax"*DEATH,JAUEX,JAUEX)

# DEATH represents the possible cell death of the cell
DEATH = GK(kade + kade'*AUCO + kade"*stress + kade"*mTOR,kide +
kide'*AUTA,Jdea,Jdea)

# 'Goldbeter-Koshland' function (GK)
GB(arg1,arg2,arg3,arg4) = arg2-arg1+arg2*arg3+arg1*arg4
GK(arg1,arg2,arg3,arg4) =
2*arg1*arg4/(GB(arg1,arg2,arg3,arg4)+sqrt(GB(arg1,arg2,arg3,arg4)^2-
4*(arg2-arg1)*arg1*arg4))

# parameters
# simulating rapamycin treatment: stress=0.75
p stress=0
p kaac=0.05, kaac'=2, kiac=0.01, kiac'=15, jAUCO=0.001, AUCOT=1
p kapai=0.02, kapai'=1, kipai=0.25, kipai'=20, kipai"*=0, kipai'"=2,
pAUIINT=1
p kaai=7.5, kai=1.5, kai'=2, AUIINT=1, JAUI=0.201
p kamtor=0.05, kamtor'=0.03, kamtor"*=0.3, kimtor=0.01, kimtor'=0.5,
kimtor"*=10, mtoT=1
```

p kaax=0.075, kaax'=0.15, kaax''=2, kiax=0.1, kiax'=20, kiax''=20, AUEXT=1, JAUEX=0.2  
 p kade=0, kade'=0.5, kade''=0.05, kade'''=0.005, kide=0.01, kide'=30, Jdea=0.1

done

## II. Figures

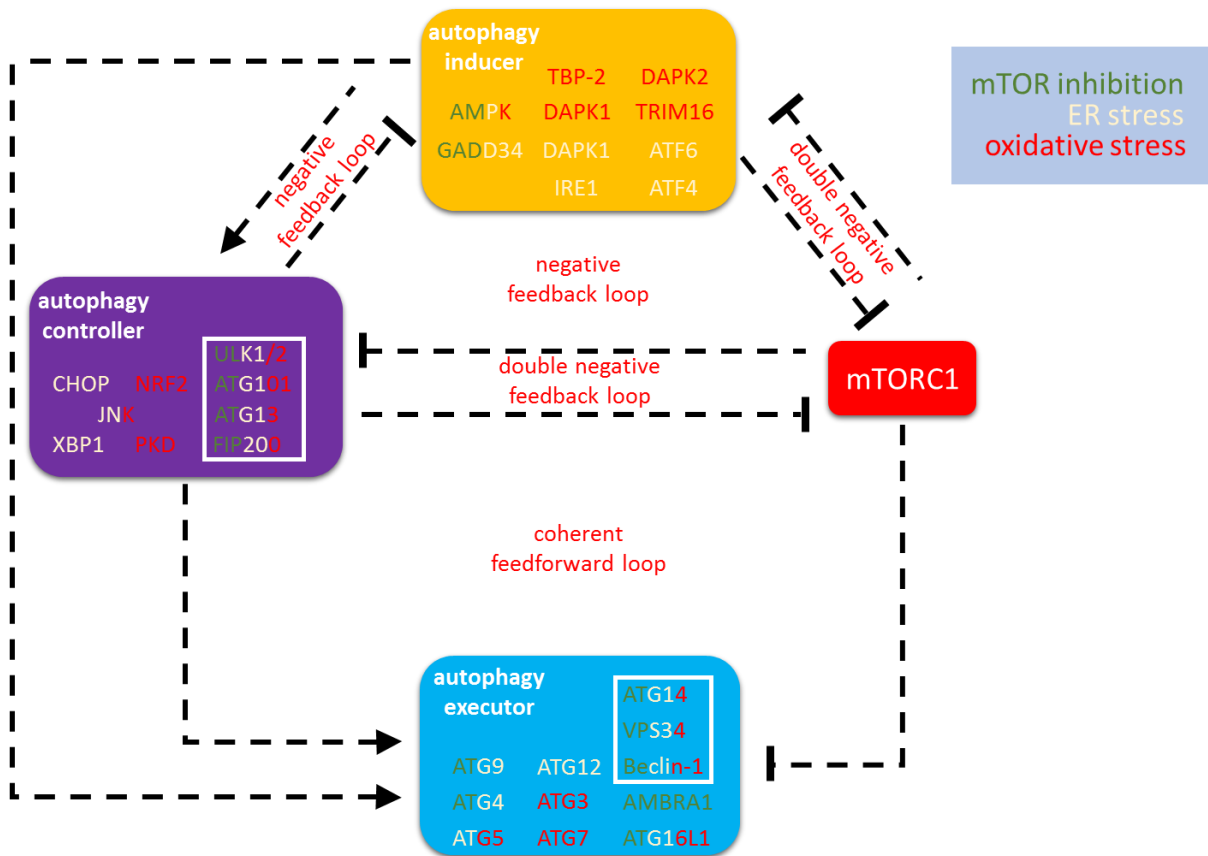

**Supplementary Figure 1. The possible regulatory components and their inter-connections in various cellular stress induced autophagy.** The autophagy inducer, the autophagy controller, the autophagy executor and mTORC1 are grouped together in isolated orange, purple, red and blue, respectively. Solid arrows represent biochemical reactions, dashed line shows how the molecules can influence each other. Blocked end lines denote inhibition.

III. Tables

|                 | autophagy inducer |                                                                                                        | autophagy controller                                                                                                               |                                                                                                              | autophagy executors                                                                                                     |                                                                                                         |                                          |
|-----------------|-------------------|--------------------------------------------------------------------------------------------------------|------------------------------------------------------------------------------------------------------------------------------------|--------------------------------------------------------------------------------------------------------------|-------------------------------------------------------------------------------------------------------------------------|---------------------------------------------------------------------------------------------------------|------------------------------------------|
|                 | protein name      | reference                                                                                              | protein name                                                                                                                       | reference                                                                                                    | protein name                                                                                                            | reference                                                                                               |                                          |
| mTOR inhibition | AMPK              | Kim et al, 2011<br>Egan et al, 2011<br>Leprivier et al, 2020<br>Filomeni et al, 2015                   | ULK1/2                                                                                                                             | Ganley et al, 2009<br>Hosokawa et al, 2009<br>Jung et al, 2009<br>Filomeni et al, 2015                       | AMBRA1                                                                                                                  | Egan, 2015<br>Di Bartolomeo et al, 2010                                                                 |                                          |
|                 |                   |                                                                                                        |                                                                                                                                    |                                                                                                              | ATG14                                                                                                                   | Wold et al, 2016                                                                                        |                                          |
|                 |                   |                                                                                                        |                                                                                                                                    |                                                                                                              | ATG4                                                                                                                    | Pengo et al, 2017                                                                                       |                                          |
|                 | GADD34            | Ito et al, 2015<br>Uddin et al, 2011<br>Watanabe et al, 2007<br>Leprivier et al, 2020                  | FIP200                                                                                                                             | Ganley et al, 2009<br>Hosokawa et al, 2009<br>Jung et al, 2009<br>Filomeni et al, 2015                       | Vps34                                                                                                                   | Kim et al, 2013<br>Russel et al, 2013<br>Egan et al, 2015                                               |                                          |
|                 |                   |                                                                                                        |                                                                                                                                    |                                                                                                              | Beclin1                                                                                                                 | Russel et al, 2013<br>Kim et al, 2013<br>Kim et al, 2013                                                |                                          |
|                 |                   |                                                                                                        |                                                                                                                                    |                                                                                                              | ATG9                                                                                                                    | Zhou et al, 2017<br>Weerasekara et al, 2014                                                             |                                          |
|                 |                   |                                                                                                        | ATG13                                                                                                                              | Ganley et al, 2009<br>Hosokawa et al, 2009<br>Jung et al, 2009<br>Puente et al, 2016<br>Filomeni et al, 2015 | ATG16L1                                                                                                                 | Dooley et al, 2014<br>Gammoh et al, 2013                                                                |                                          |
|                 |                   |                                                                                                        |                                                                                                                                    |                                                                                                              | ATG101                                                                                                                  | Hosokawa et al, 2009<br>Mercer et al, 2009                                                              |                                          |
|                 | oxidative stress  | AMPK                                                                                                   | Kosztelnik et al, 2018<br>Gao, 2019<br>Shiomi et al, 2014<br>Filomeni et al, 2015<br>Navarro-Yepes et al, 2014<br>Wang et al, 2011 | NRF2                                                                                                         | Jena et al, 2018<br>Filomeni et al, 2015<br>Navarro-Yepes et al, 2014<br>Medvedev et al, 2016<br>Kosztelnik et al, 2018 | Beclin1                                                                                                 | Liu et al, 2015<br>Lerner et al, 2012    |
|                 |                   |                                                                                                        |                                                                                                                                    |                                                                                                              |                                                                                                                         | VPS34                                                                                                   | Lerner et al, 2012<br>Lerner et al, 2012 |
| ATG14           |                   |                                                                                                        |                                                                                                                                    |                                                                                                              |                                                                                                                         | Geering, 2015                                                                                           |                                          |
| ATG16L          |                   |                                                                                                        |                                                                                                                                    |                                                                                                              |                                                                                                                         | Jena et al, 2018                                                                                        |                                          |
| TBP-2           |                   | Zhou et al, 2016                                                                                       | JNK                                                                                                                                | Liu et al, 2015<br>Lerner et al, 2007                                                                        | ATG 5                                                                                                                   | Wang et al, 2015                                                                                        |                                          |
| DAPK1           |                   | Lerner et al, 2012<br>Lerner et al, 2007<br>Lerner et al, 2012                                         | ULK1/2                                                                                                                             | Filomeni et al, 2015<br>Navarro-Yepes et al, 2014<br>Jena et al, 2018                                        | ATG7                                                                                                                    | Wang et al, 2015<br>Burgoyne et al, 2018                                                                |                                          |
|                 |                   |                                                                                                        |                                                                                                                                    |                                                                                                              | ATG3                                                                                                                    | Burgoyne et al, 2018                                                                                    |                                          |
| DAPK2           |                   | Schlegel et al, 2015<br>Geering, 2015                                                                  | FIP200                                                                                                                             | Navarro-Yepes et al, 2014<br>Filomeni et al, 2015                                                            | ATG4                                                                                                                    | Scherz-Shouval et al, 2007<br>Filomeni et al, 2015<br>Navarro-Yepes et al, 2014                         |                                          |
| TRIM16          |                   | Jena et al, 2018                                                                                       | ATG13                                                                                                                              | Navarro-Yepes et al, 2014<br>Filomeni et al, 2015                                                            |                                                                                                                         |                                                                                                         |                                          |
|                 |                   |                                                                                                        | ATG101                                                                                                                             | Navarro-Yepes et al, 2014<br>Filomeni et al, 2015                                                            |                                                                                                                         |                                                                                                         |                                          |
|                 |                   | PKD                                                                                                    | Lerner et al, 2012<br>Lerner et al, 2012<br>Lerner et al, 2007                                                                     |                                                                                                              |                                                                                                                         |                                                                                                         |                                          |
| ER stress       | AMPK              | Kandala et al, 2012<br>Liu et al, 2018<br>Qi et al, 2015<br>Xi et al, 2013                             | ULK1/2                                                                                                                             | Song et al, 2018<br>Lin et al, 2019                                                                          | Beclin-1                                                                                                                | Song et al, 2018<br>Cheng et al, 2014<br>Margariti et al, 2013<br>B'chir et al, 2013<br>Lin et al, 2019 |                                          |
|                 |                   |                                                                                                        | FIP200                                                                                                                             | Song et al, 2018<br>Lin et al, 2019                                                                          |                                                                                                                         |                                                                                                         |                                          |
|                 | GADD34            | Hyrskyluoto et al, 2012<br>Holczer et al, 2016                                                         | ATG13                                                                                                                              | Song et al, 2018<br>Lin et al, 2019                                                                          | VPS34                                                                                                                   | Song et al, 2018                                                                                        |                                          |
|                 | DAPK1             | Song et al, 2018                                                                                       | ATG101                                                                                                                             | Song et al, 2018<br>Lin et al, 2019                                                                          | ATG14                                                                                                                   | Song et al, 2018                                                                                        |                                          |
|                 | IRE1              | Song et al, 2018<br>Ogata et al, 2006<br>Cheng et al, 2014<br>Margariti et al, 2013<br>Lin et al, 2019 | CHOP                                                                                                                               | Song et al, 2018<br>B'chir et al, 2013<br>Guo et al, 2014<br>Lin et al, 2019                                 | ATG16L                                                                                                                  | Song et al, 2018<br>B'chir et al, 2013                                                                  |                                          |
|                 |                   |                                                                                                        |                                                                                                                                    |                                                                                                              | ATG5                                                                                                                    | Song et al, 2018<br>B'chir et al, 2013<br>Lin et al, 2019                                               |                                          |
|                 | ATF4              | B'chir et al, 2013<br>Lin et al, 2019<br>Song et al, 2018                                              | JNK                                                                                                                                | Song et al, 2018<br>Ogata et al, 2006<br>Cheng et al, 2014<br>Lin et al, 2019                                | ATG12                                                                                                                   | B'chir et al, 2013<br>Lin et al, 2019<br>Song et al, 2018                                               |                                          |
|                 | ATF6              | Song et al, 2018<br>Guo et al, 2014<br>Lin et al, 2019                                                 |                                                                                                                                    |                                                                                                              | ATG9                                                                                                                    | Lin et al, 2019                                                                                         |                                          |
|                 |                   |                                                                                                        | XBP1                                                                                                                               | Song et al, 2018<br>Hetz et al, 2009<br>Margariti et al, 2013<br>Guo et al, 2014                             | ATG4                                                                                                                    | Chen et al, 2012                                                                                        |                                          |
|                 |                   |                                                                                                        |                                                                                                                                    |                                                                                                              |                                                                                                                         |                                                                                                         |                                          |

Supplementary Table 1. Collecting data from literature about possible regulatory components of autophagy induction upon various cellular stress.

| Connections               | References              |
|---------------------------|-------------------------|
| AMPK -> ULK1/2            | Bach et al, 2011        |
|                           | Egan et al, 2011        |
|                           | Kim et al, 2011         |
|                           | Roach, 2011             |
|                           | Shang et al, 2011       |
|                           | Urano et al, 2018       |
|                           | Cardaci et al, 2012     |
|                           | Kaushal et al, 2019     |
|                           | Holczer et al, 2018     |
|                           | Zhao et al, 2016        |
| Lee et al, 2010           |                         |
| Behrends et al, 2010      |                         |
| Tamargo-Gómez et al, 2018 |                         |
| ULK1/2 -I AMPK            | Löffler et al, 2011     |
|                           | Dite et al, 2017        |
| ULK1/2 -I mTORC1          | Dunlop et al, 2011      |
|                           | Jung et al, 2011        |
| AMPK -I mTORC1            | Gwinn et al, 2008       |
|                           | Inoki et al, 2003       |
|                           | Kaushal et al, 2019     |
|                           | She et al, 2014         |
|                           | Alexander et al, 2010   |
|                           | Zhao et al, 2016        |
|                           | Meley et al, 2006       |
| Tamargo-Gómez et al, 2018 |                         |
| mTORC1 -I ULK1/2          | Ganley et al, 2009      |
|                           | Hosokawa et al, 2009    |
|                           | Kim et al, 2011         |
|                           | Jung et al, 2009        |
|                           | Zhao et al, 2016        |
| mTORC1 -I AMPK            | Holczer et al, 2019     |
|                           | Ling et al, 2020        |
| AMPK -> autophagy         | Meijer et al, 2015      |
|                           | Abada et al, 2014       |
|                           | Xi et al, 2013          |
|                           | Zhao et al, 2016        |
|                           | Meley et al, 2006       |
| Tamargo-Gómez et al, 2018 |                         |
| ULK1/2 -> autophagy       | Kim et al, 2011         |
|                           | Russel et al, 2013      |
|                           | Urano et al, 2018       |
|                           | Zhao et al, 2016        |
|                           | Zachari et al, 2017     |
| mTOR -I autophagy         | Nazio et al, 2013       |
|                           | Yuan et al, 2013        |
|                           | Settembre et al, 2012   |
|                           | Martina et al, 2012     |
|                           | Settembre et al, 2013   |
|                           | Kim et al, 2015         |
| GADD34 -I mTORC1          | Uddin et al, 2011       |
|                           | Watanabe et al, 2007    |
|                           | Hyrskyluoto et al, 2012 |
|                           | Holczer et al, 2016     |
| AMPK -> NRF2              | Salminen et al, 2012    |
|                           | Joo et al, 2016         |
|                           | Lin et al, 2018         |
| NRF2 -I AMPK              | Kosztelnik et al, 2018  |
| GADD34 -> autophagy       | Ito et al, 2015         |
|                           | Uddin et al, 2011       |
| CHOP -> autophagy         | B'chir et al, 2013      |
|                           | Rouschop et al, 2010    |
| IRE1 -> autophagy         | Song et al, 2018        |
|                           | Ogata et al, 2006       |

|                                                         |
|---------------------------------------------------------|
| mTOR inhibition (starvation, rapamycin treatment, etc.) |
| oxidative stress                                        |
| ER stress                                               |
| oxidative stress + mTOR inhibition                      |
| ER stress + mTOR inhibition                             |
| none of them                                            |

**Supplementary Table 2. Collecting data from literature about the proved regulatory connections during cellular stress induced autophagy regulation.**

#### IV. Introducing the theoretical analysis of phosphorylation site search on NRF2

The potential Ser and Thr phosphorylation sites of ULK1/2 were identified on NRF2 sequence by Group-based Prediction System 5.0 (<http://gps.biocuckoo.cn/>). The sequence of NRF2 was downloaded from UniProt (<https://www.uniprot.org/>). The threshold was high under prediction. Table 3. includes the position of Ser and Thr amino acids, the catalytic subunits of ULK1/2, the peptid sequence in the near of Ser and Thr amino acids and the score values. The score value is calculated by GPS algorithm to evaluate the potential of phosphorylation. The higher the value, the more potential the residue is phosphorylated (<http://gps.biocuckoo.cn/>).

The phosphorylation sites were verified by NetPhos 3.1 (<http://www.cbs.dtu.dk/services/NetPhos>). Those phosphorylation sites were collected and checked where the phosphorylation kinase was unknown (see the NetPhos column in the Table 3.). The score above 0.500 indicates positive predictions.

The phosphorylation sites were also searched with the help of PhosphositePlus (<https://www.phosphosite.org/homeAction.action>). In this database, the consensus phosphorylation motif of ULK1 is used, which is created with the help of several well-known phosphorylated sequences of ULK1 substrates. The same amino acids within the identified potential ULK1 phosphorylation sequences were marked with red colour (see the Peptid column of Table 3.).

*Detailed description the legend of Supplementary Table 3.*

| ULK1/2 phosphorylation sites on NRF2    |                               |                    |                                           |                                      | NetPhos                              |
|-----------------------------------------|-------------------------------|--------------------|-------------------------------------------|--------------------------------------|--------------------------------------|
| Position                                | Code                          | Enzyme             | Peptide                                   | Score                                | Score - kinase (unknown)             |
| the position number # of S/T P'ion site | Ser (S) or Thr (T) P'ion site | name of the kinase | consensus P'ion sequence with red letters | evaluate the potential of P'ion site | evaluate the potential of P'ion site |

#### Consensus ULK1-dependent phosphorylation sites

PhosphoSite Plus shows the preferred Ser and Thr phosphorylation sites of ULK1 kinase: <https://www.phosphosite.org/proteinAction.action?id=796&showAllSites=true>

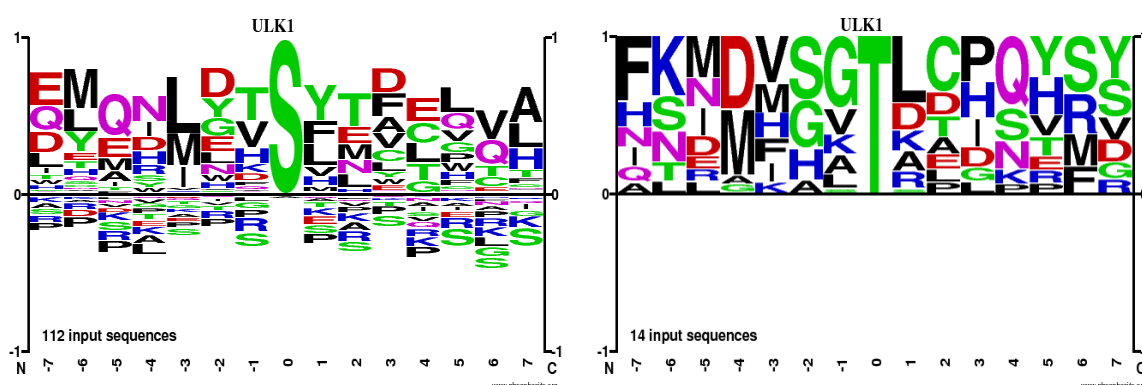

The preferred Ser and Thr phosphorylation sites of ULK2 kinase is not known yet, however the protein sequence identity is 78% within the kinase domains of ULK1 and ULK2 (8).

**Table 3.** *ULK1/2 phosphorylation sites on different isoforms of NRF2*

| ULK1/2 phosphorylation sites on NRF2 Isoform 1 |      |        |                 |        | NetPhos                  |
|------------------------------------------------|------|--------|-----------------|--------|--------------------------|
| Position                                       | Code | Enzyme | Peptide         | Score  | Score - kinase (unknown) |
| 351                                            | S    | ULK1   | SGISLNTSPSVASPE | 38.529 | 0.981 unsp               |
| 410                                            | S    | ULK1   | MVQPLSPSQGQSTHV | 42.467 |                          |
| 231                                            | S    | ULK2   | DNYHFYSSIPSMEKE | 4.744  |                          |
| 320                                            | S    | ULK2   | LNGPIDVSDLCLCKA | 4.537  |                          |
| 414                                            | S    | ULK2   | LSPSQGQSTHVHDAQ | 5.696  | 0.638 unsp               |
| 447                                            | S    | ULK2   | PFTKDKHSSRLEAHL | 4.241  | 0.992 unsp               |
| ULK1/2 phosphorylation sites on NRF2 Isoform 2 |      |        |                 |        | NetPhos                  |
| Position                                       | Code | Enzyme | Peptide         | Score  | Score - kinase (unknown) |
| 335                                            | S    | ULK1   | SGISLNTSPSVASPE | 38.529 | 0.981 unsp               |
| 394                                            | S    | ULK1   | MVQPLSPSQGQSTHV | 42.467 |                          |
| 17                                             | S    | ULK2   | QDIDLGVREVFDFS  | 4.638  | 0.971 unsp               |
| 215                                            | S    | ULK2   | DNYHFYSSIPSMEKE | 4.744  |                          |
| 304                                            | S    | ULK2   | LNGPIDVSDLCLCKA | 4.537  |                          |
| 398                                            | S    | ULK2   | LSPSQGQSTHVHDAQ | 5.696  | 0.638 unsp               |
| 431                                            | S    | ULK2   | PFTKDKHSSRLEAHL | 4.241  | 0.992 unsp               |
| ULK1/2 phosphorylation sites on NRF2 Isoform 3 |      |        |                 |        | NetPhos                  |
| Position                                       | Code | Enzyme | Peptide         | Score  | Score - kinase (unknown) |
| 328                                            | S    | ULK1   | SGISLNTSPSVASPE | 38.529 | 0.981 unsp               |
| 387                                            | S    | ULK1   | MVQPLSPSQGQSTHV | 42.467 |                          |
| 17                                             | S    | ULK2   | QDIDLGVREVFDFS  | 4.638  | 0.971 unsp               |
| 208                                            | S    | ULK2   | DNYHFYSSIPSMEKE | 4.744  |                          |
| 297                                            | S    | ULK2   | LNGPIDVSDLCLCKA | 4.537  |                          |
| 391                                            | S    | ULK2   | LSPSQGQSTHVHDAQ | 5.696  | 0.638 unsp               |
| 424                                            | S    | ULK2   | PFTKDKHSSRLEAHL | 4.241  | 0.992 unsp               |



## V. References

1. Tyson JJ, Chen KC, Novak B. Sniffers, buzzers, toggles and blinkers: dynamics of regulatory and signaling pathways in the cell. *Curr Opin Cell Biol.* 2003;15(2):221-31.
2. Tyson JJ, Novak B. Functional motifs in biochemical reaction networks. *Annu Rev Phys Chem.* 2010;61:219-40.
3. Tyson JJ, Chen K, Novak B. Network dynamics and cell physiology. *Nature Rev Mol Cell Biol.* 2001;2:908-16.
4. Strogatz SH. *Nonlinear dynamics and Chaos : with applications to physics, biology, chemistry, and engineering.* Reading, Mass.: Addison-Wesley Pub.; 1994. xi, 498 p. p.
5. Segel IH. *Enzyme kinetics behavior and analysis of rapid equilibrium and steady state enzyme systems:* Wiley; 1975.
6. Goldbeter A, Koshland DE, Jr. An amplified sensitivity arising from covalent modification in biological systems. *Proc Natl Acad Sci U S A.* 1981;78(11):6840-4.
7. Tyson JJ, Csikasz-Nagy A, Novak B. The dynamics of cell cycle regulation. *BioEssays.* 2002;24:1095-109.
8. Zachari M, Ganley IG. The mammalian ULK1 complex and autophagy initiation. *Essays Biochem.* 2017;61(6):585-96.
9. Abada A, Elazar Z. Getting ready for building: signaling and autophagosome biogenesis. *EMBO Rep.* 2014;15(8):839-52.
10. Alexander A, Cai SL, Kim J, Nanez A, Sahin M, MacLean KH, et al. ATM signals to TSC2 in the cytoplasm to regulate mTORC1 in response to ROS. *Proc Natl Acad Sci U S A.* 2010;107(9):4153-8.
11. B'Chir W, Maurin AC, Carraro V, Averous J, Jousse C, Muranishi Y, et al. The eIF2alpha/ATF4 pathway is essential for stress-induced autophagy gene expression. *Nucleic Acids Res.* 2013;41(16):7683-99.
12. Bach M, Larance M, James DE, Ramm G. The serine/threonine kinase ULK1 is a target of multiple phosphorylation events. *Biochem J.* 2011;440(2):283-91.
13. Behrends C, Sowa ME, Gygi SP, Harper JW. Network organization of the human autophagy system. *Nature.* 2010;466(7302):68-76.
14. Burgoyne JR. Oxidative stress impairs autophagy through oxidation of ATG3 and ATG7. *Autophagy.* 2018;14(6):1092-3.
15. Cardaci S, Filomeni G, Ciriolo MR. Redox implications of AMPK-mediated signal transduction beyond energetic clues. *J Cell Sci.* 2012;125(Pt 9):2115-25.
16. Cheng X, Liu H, Jiang CC, Fang L, Chen C, Zhang XD, et al. Connecting endoplasmic reticulum stress to autophagy through IRE1/JNK/beclin-1 in breast cancer cells. *Int J Mol Med.* 2014;34(3):772-81.
17. Di Bartolomeo S, Corazzari M, Nazio F, Oliverio S, Lisi G, Antonioli M, et al. The dynamic interaction of AMBRA1 with the dynein motor complex regulates mammalian autophagy. *J Cell Biol.* 2010;191(1):155-68.
18. Dite TA, Ling NXY, Scott JW, Hoque A, Galic S, Parker BL, et al. The autophagy initiator ULK1 sensitizes AMPK to allosteric drugs. *Nat Commun.* 2017;8(1):571.
19. Dooley HC, Razi M, Polson HE, Girardin SE, Wilson MI, Tooze SA. WIPI2 links LC3 conjugation with PI3P, autophagosome formation, and pathogen clearance by recruiting Atg12-5-16L1. *Mol Cell.* 2014;55(2):238-52.
20. Dunlop EA, Hunt DK, Acosta-Jaquez HA, Fingar DC, Tee AR. ULK1 inhibits mTORC1 signaling, promotes multisite Raptor phosphorylation and hinders substrate binding. *Autophagy.* 2011;7(7):737-47.
21. Egan DF, Chun MG, Vamos M, Zou H, Rong J, Miller CJ, et al. Small Molecule Inhibition of the Autophagy Kinase ULK1 and Identification of ULK1 Substrates. *Mol Cell.* 2015;59(2):285-97.
22. Egan DF, Shackelford DB, Mihaylova MM, Gelino S, Kohnz RA, Mair W, et al. Phosphorylation of ULK1 (hATG1) by AMP-activated protein kinase connects energy sensing to mitophagy. *Science.* 2011;331(6016):456-61.
23. Eisenberg-Lerner A, Kimchi A. DAP kinase regulates JNK signaling by binding and activating protein kinase D under oxidative stress. *Cell Death Differ.* 2007;14(11):1908-15.
24. Eisenberg-Lerner A, Kimchi A. PKD is a kinase of Vps34 that mediates ROS-induced autophagy downstream of DAPk. *Cell Death Differ.* 2012;19(5):788-97.
25. Eisenberg-Lerner A, Kimchi A. PKD at the crossroads of necrosis and autophagy. *Autophagy.* 2012;8(3):433-4.
26. Filomeni G, De Zio D, Cecconi F. Oxidative stress and autophagy: the clash between damage and metabolic needs. *Cell Death Differ.* 2015;22(3):377-88.
27. Gammoh N, Florey O, Overholtzer M, Jiang X. Interaction between FIP200 and ATG16L1 distinguishes ULK1 complex-dependent and -independent autophagy. *Nat Struct Mol Biol.* 2013;20(2):144-9.

28. Ganley IG, Lam du H, Wang J, Ding X, Chen S, Jiang X. ULK1.ATG13.FIP200 complex mediates mTOR signaling and is essential for autophagy. *J Biol Chem*. 2009;284(18):12297-305.
29. Gao Q. Oxidative Stress and Autophagy. *Adv Exp Med Biol*. 2019;1206:179-98.
30. Geering B. Death-associated protein kinase 2: Regulator of apoptosis, autophagy and inflammation. *Int J Biochem Cell Biol*. 2015;65:151-4.
31. Guo FJ, Xiong Z, Lu X, Ye M, Han X, Jiang R. ATF6 upregulates XBP1S and inhibits ER stress-mediated apoptosis in osteoarthritis cartilage. *Cell Signal*. 2014;26(2):332-42.
32. Gwinn DM, Shackelford DB, Egan DF, Mihaylova MM, Mery A, Vasquez DS, et al. AMPK phosphorylation of raptor mediates a metabolic checkpoint. *Mol Cell*. 2008;30(2):214-26.
33. Hetz C, Thielen P, Matus S, Nassif M, Court F, Kiffin R, et al. XBP-1 deficiency in the nervous system protects against amyotrophic lateral sclerosis by increasing autophagy. *Genes Dev*. 2009;23(19):2294-306.
34. Holczer M, Banhegyi G, Kapuy O. GADD34 Keeps the mTOR Pathway Inactivated in Endoplasmic Reticulum Stress Related Autophagy. *PLoS One*. 2016;11(12):e0168359.
35. Holczer M, Besze B, Zambo V, Csala M, Banhegyi G, Kapuy O. Epigallocatechin-3-Gallate (EGCG) Promotes Autophagy-Dependent Survival via Influencing the Balance of mTOR-AMPK Pathways upon Endoplasmic Reticulum Stress. *Oxid Med Cell Longev*. 2018;2018:6721530.
36. Holczer M, Hajdu B, Lorincz T, Szarka A, Banhegyi G, Kapuy O. A Double Negative Feedback Loop between mTORC1 and AMPK Kinases Guarantees Precise Autophagy Induction upon Cellular Stress. *Int J Mol Sci*. 2019;20(22).
37. Hosokawa N, Hara T, Kaizuka T, Kishi C, Takamura A, Miura Y, et al. Nutrient-dependent mTORC1 association with the ULK1-Atg13-FIP200 complex required for autophagy. *Mol Biol Cell*. 2009;20(7):1981-91.
38. Hosokawa N, Sasaki T, Iemura S, Natsume T, Hara T, Mizushima N. Atg101, a novel mammalian autophagy protein interacting with Atg13. *Autophagy*. 2009;5(7):973-9.
39. Hyrskyluoto A, Reijonen S, Kivinen J, Lindholm D, Korhonen L. GADD34 mediates cytoprotective autophagy in mutant huntingtin expressing cells via the mTOR pathway. *Exp Cell Res*. 2012;318(1):33-42.
40. Inoki K, Zhu T, Guan KL. TSC2 mediates cellular energy response to control cell growth and survival. *Cell*. 2003;115(5):577-90.
41. Ito S, Tanaka Y, Oshino R, Aiba K, Thanasegaran S, Nishio N, et al. GADD34 inhibits activation-induced apoptosis of macrophages through enhancement of autophagy. *Sci Rep*. 2015;5:8327.
42. Jena KK, Kolapalli SP, Mehto S, Nath P, Das B, Sahoo PK, et al. TRIM16 controls assembly and degradation of protein aggregates by modulating the p62-NRF2 axis and autophagy. *EMBO J*. 2018;37(18).
43. Joo MS, Kim WD, Lee KY, Kim JH, Koo JH, Kim SG. AMPK Facilitates Nuclear Accumulation of Nrf2 by Phosphorylating at Serine 550. *Mol Cell Biol*. 2016;36(14):1931-42.
44. Jung CH, Jun CB, Ro SH, Kim YM, Otto NM, Cao J, et al. ULK-Atg13-FIP200 complexes mediate mTOR signaling to the autophagy machinery. *Mol Biol Cell*. 2009;20(7):1992-2003.
45. Jung CH, Seo M, Otto NM, Kim DH. ULK1 inhibits the kinase activity of mTORC1 and cell proliferation. *Autophagy*. 2011;7(10):1212-21.
46. Kandala PK, Srivastava SK. Regulation of macroautophagy in ovarian cancer cells in vitro and in vivo by controlling glucose regulatory protein 78 and AMPK. *Oncotarget*. 2012;3(4):435-49.
47. Kaushal GP, Chandrashekar K, Juncos LA. Molecular Interactions Between Reactive Oxygen Species and Autophagy in Kidney Disease. *Int J Mol Sci*. 2019;20(15).
48. Kim J, Guan KL. AMPK connects energy stress to PIK3C3/VPS34 regulation. *Autophagy*. 2013;9(7):1110-1.
49. Kim J, Kim YC, Fang C, Russell RC, Kim JH, Fan W, et al. Differential regulation of distinct Vps34 complexes by AMPK in nutrient stress and autophagy. *Cell*. 2013;152(1-2):290-303.
50. Kim J, Kundu M, Viollet B, Guan KL. AMPK and mTOR regulate autophagy through direct phosphorylation of Ulk1. *Nat Cell Biol*. 2011;13(2):132-41.
51. Kim YC, Guan KL. mTOR: a pharmacologic target for autophagy regulation. *J Clin Invest*. 2015;125(1):25-32.
52. Kosztelnik M, Kurucz A, Papp D, Jones E, Sigmond T, Barna J, et al. Suppression of AMPK/aak-2 by NRF2/SKN-1 down-regulates autophagy during prolonged oxidative stress. *FASEB J*. 2019;33(2):2372-87.
53. Lee JW, Park S, Takahashi Y, Wang HG. The association of AMPK with ULK1 regulates autophagy. *PLoS One*. 2010;5(11):e15394.
54. Leprivier G, Rotblat B. How does mTOR sense glucose starvation? AMPK is the usual suspect. *Cell Death Discov*. 2020;6:27.
55. Lin Y, Jiang M, Chen W, Zhao T, Wei Y. Cancer and ER stress: Mutual crosstalk between autophagy, oxidative stress and inflammatory response. *Biomed Pharmacother*. 2019;118:109249.

56. Ling NXY, Kaczmarek A, Hoque A, Davie E, Ngoei KRW, Morrison KR, et al. mTORC1 directly inhibits AMPK to promote cell proliferation under nutrient stress. *Nat Metab.* 2020;2(1):41-9.
57. Liu GY, Jiang XX, Zhu X, He WY, Kuang YL, Ren K, et al. ROS activates JNK-mediated autophagy to counteract apoptosis in mouse mesenchymal stem cells in vitro. *Acta Pharmacol Sin.* 2015;36(12):1473-9.
58. Liu JQ, Zhang L, Yao J, Yao S, Yuan T. AMPK alleviates endoplasmic reticulum stress by inducing the ER-chaperone ORP150 via FOXO1 to protect human bronchial cells from apoptosis. *Biochem Biophys Res Commun.* 2018;497(2):564-70.
59. Loffler AS, Alers S, Dieterle AM, Keppeler H, Franz-Wachtel M, Kundu M, et al. Ulk1-mediated phosphorylation of AMPK constitutes a negative regulatory feedback loop. *Autophagy.* 2011;7(7):696-706.
60. Margariti A, Li H, Chen T, Martin D, Vizcay-Barrena G, Alam S, et al. XBP1 mRNA splicing triggers an autophagic response in endothelial cells through BECLIN-1 transcriptional activation. *J Biol Chem.* 2013;288(2):859-72.
61. Martina JA, Chen Y, Gucek M, Puertollano R. MTORC1 functions as a transcriptional regulator of autophagy by preventing nuclear transport of TFEB. *Autophagy.* 2012;8(6):903-14.
62. Medvedev R, Hildt E, Ploen D. Look who's talking-the crosstalk between oxidative stress and autophagy supports exosomal-dependent release of HCV particles. *Cell Biol Toxicol.* 2017;33(3):211-31.
63. Meijer AJ, Lorin S, Blommaert EF, Codogno P. Regulation of autophagy by amino acids and MTOR-dependent signal transduction. *Amino Acids.* 2015;47(10):2037-63.
64. Meley D, Bauvy C, Houben-Weerts JH, Dubbelhuis PF, Helmond MT, Codogno P, et al. AMP-activated protein kinase and the regulation of autophagic proteolysis. *J Biol Chem.* 2006;281(46):34870-9.
65. Mercer CA, Kaliappan A, Dennis PB. A novel, human Atg13 binding protein, Atg101, interacts with ULK1 and is essential for macroautophagy. *Autophagy.* 2009;5(5):649-62.
66. Navarro-Yepes J, Burns M, Anandhan A, Khalimonchuk O, del Razo LM, Quintanilla-Vega B, et al. Oxidative stress, redox signaling, and autophagy: cell death versus survival. *Antioxid Redox Signal.* 2014;21(1):66-85.
67. Nazio F, Strappazzon F, Antonioli M, Bielli P, Cianfanelli V, Bordi M, et al. mTOR inhibits autophagy by controlling ULK1 ubiquitylation, self-association and function through AMBRA1 and TRAF6. *Nat Cell Biol.* 2013;15(4):406-16.
68. Ogata M, Hino S, Saito A, Morikawa K, Kondo S, Kanemoto S, et al. Autophagy is activated for cell survival after endoplasmic reticulum stress. *Mol Cell Biol.* 2006;26(24):9220-31.
69. Pengo N, Agrotis A, Prak K, Jones J, Ketteler R. A reversible phospho-switch mediated by ULK1 regulates the activity of autophagy protease ATG4B. *Nat Commun.* 2017;8(1):294.
70. Qi D, Young LH. AMPK: energy sensor and survival mechanism in the ischemic heart. *Trends Endocrinol Metab.* 2015;26(8):422-9.
71. Roach PJ. AMPK -> ULK1 -> autophagy. *Mol Cell Biol.* 2011;31(15):3082-4.
72. Rouschop KM, van den Beucken T, Dubois L, Niessen H, Bussink J, Savelkoul K, et al. The unfolded protein response protects human tumor cells during hypoxia through regulation of the autophagy genes MAP1LC3B and ATG5. *J Clin Invest.* 2010;120(1):127-41.
73. Russell RC, Tian Y, Yuan H, Park HW, Chang YY, Kim J, et al. ULK1 induces autophagy by phosphorylating Beclin-1 and activating VPS34 lipid kinase. *Nat Cell Biol.* 2013;15(7):741-50.
74. Salminen A, Kaarniranta K. AMP-activated protein kinase (AMPK) controls the aging process via an integrated signaling network. *Ageing Res Rev.* 2012;11(2):230-41.
75. Scherz-Shouval R, Shvets E, Fass E, Shorer H, Gil L, Elazar Z. Reactive oxygen species are essential for autophagy and specifically regulate the activity of Atg4. *EMBO J.* 2007;26(7):1749-60.
76. Schlegel CR, Georgiou ML, Misterek MB, Stocker S, Chater ER, Munro CE, et al. DAPK2 regulates oxidative stress in cancer cells by preserving mitochondrial function. *Cell Death Dis.* 2015;6:e1671.
77. Settembre C, Fraldi A, Medina DL, Ballabio A. Signals from the lysosome: a control centre for cellular clearance and energy metabolism. *Nat Rev Mol Cell Biol.* 2013;14(5):283-96.
78. Settembre C, Zoncu R, Medina DL, Vetrini F, Erdin S, Erdin S, et al. A lysosome-to-nucleus signalling mechanism senses and regulates the lysosome via mTOR and TFEB. *EMBO J.* 2012;31(5):1095-108.
79. Shang L, Chen S, Du F, Li S, Zhao L, Wang X. Nutrient starvation elicits an acute autophagic response mediated by Ulk1 dephosphorylation and its subsequent dissociation from AMPK. *Proc Natl Acad Sci U S A.* 2011;108(12):4788-93.
80. She C, Zhu LQ, Zhen YF, Wang XD, Dong QR. Activation of AMPK protects against hydrogen peroxide-induced osteoblast apoptosis through autophagy induction and NADPH maintenance: new implications for osteonecrosis treatment? *Cell Signal.* 2014;26(1):1-8.

81. Shiomi M, Miyamae M, Takemura G, Kaneda K, Inamura Y, Onishi A, et al. Sevoflurane induces cardioprotection through reactive oxygen species-mediated upregulation of autophagy in isolated guinea pig hearts. *J Anesth*. 2014;28(4):593-600.
82. Song S, Tan J, Miao Y, Zhang Q. Crosstalk of ER stress-mediated autophagy and ER-phagy: Involvement of UPR and the core autophagy machinery. *J Cell Physiol*. 2018;233(5):3867-74.
83. Tamargo-Gomez I, Marino G. AMPK: Regulation of Metabolic Dynamics in the Context of Autophagy. *Int J Mol Sci*. 2018;19(12).
84. Uddin MN, Ito S, Nishio N, Suganya T, Isobe K. Gadd34 induces autophagy through the suppression of the mTOR pathway during starvation. *Biochem Biophys Res Commun*. 2011;407(4):692-8.
85. Urano Y, Mori C, Fuji A, Konno K, Yamamoto T, Yashirogi S, et al. 6-Hydroxydopamine induces secretion of PARK7/DJ-1 via autophagy-based unconventional secretory pathway. *Autophagy*. 2018;14(11):1943-58.
86. Wang Q, Liang B, Shirwany NA, Zou MH. 2-Deoxy-D-glucose treatment of endothelial cells induces autophagy by reactive oxygen species-mediated activation of the AMP-activated protein kinase. *PLoS One*. 2011;6(2):e17234.
87. Wang T, Wang Q, Song R, Zhang Y, Zhang K, Yuan Y, et al. Autophagy Plays a Cytoprotective Role During Cadmium-Induced Oxidative Damage in Primary Neuronal Cultures. *Biol Trace Elem Res*. 2015;168(2):481-9.
88. Watanabe R, Tambe Y, Inoue H, Isono T, Haneda M, Isobe K, et al. GADD34 inhibits mammalian target of rapamycin signaling via tuberous sclerosis complex and controls cell survival under bioenergetic stress. *Int J Mol Med*. 2007;19(3):475-83.
89. Weerasekara VK, Panek DJ, Broadbent DG, Mortenson JB, Mathis AD, Logan GN, et al. Metabolic-stress-induced rearrangement of the 14-3-3zeta interactome promotes autophagy via a ULK1- and AMPK-regulated 14-3-3zeta interaction with phosphorylated Atg9. *Mol Cell Biol*. 2014;34(24):4379-88.
90. Wold MS, Lim J, Lachance V, Deng Z, Yue Z. ULK1-mediated phosphorylation of ATG14 promotes autophagy and is impaired in Huntington's disease models. *Mol Neurodegener*. 2016;11(1):76.
91. Xi H, Barredo JC, Merchan JR, Lampidis TJ. Endoplasmic reticulum stress induced by 2-deoxyglucose but not glucose starvation activates AMPK through CaMKKbeta leading to autophagy. *Biochem Pharmacol*. 2013;85(10):1463-77.
92. Yuan HX, Russell RC, Guan KL. Regulation of PIK3C3/VPS34 complexes by MTOR in nutrient stress-induced autophagy. *Autophagy*. 2013;9(12):1983-95.
93. Zachari M, Ganley IG. The mammalian ULK1 complex and autophagy initiation. *Essays Biochem*. 2017;61(6):585-96.
94. Zhao F, Huang W, Zhang Z, Mao L, Han Y, Yan J, et al. Triptolide induces protective autophagy through activation of the CaMKKbeta-AMPK signaling pathway in prostate cancer cells. *Oncotarget*. 2016;7(5):5366-82.
95. Zhou C, Ma K, Gao R, Mu C, Chen L, Liu Q, et al. Regulation of mATG9 trafficking by Src- and ULK1-mediated phosphorylation in basal and starvation-induced autophagy. *Cell Res*. 2017;27(2):184-201.
96. Zhou J, Yao K, Zhang Y, Chen G, Lai K, Yin H, et al. Thioredoxin Binding Protein-2 Regulates Autophagy of Human Lens Epithelial Cells under Oxidative Stress via Inhibition of Akt Phosphorylation. *Oxid Med Cell Longev*. 2016;2016:4856431.
